# Supplementary material for: Effects of Risperidone in Autistic Children and Young Adults: A Systematic Review and Meta-Analysis
Source: PubMed Central journal article supplement — Curr Neuropharmacol. 2021 Apr;19(4):538–52. doi: 10.2174/1570159X18666200529151741 (PMC8206457; doi:10.2174/1570159x18666200529151741), 2021-04
Supplement: CN-19-538_SD1.pdf [file CN-19-538_SD1.pdf]

## SUPPLEMENTARY MATERIAL

### Effects of Risperidone in Autistic Children and Young Adults: A Systematic Review and Meta-Analysis

Brayan Jonas Mano-Sousa<sup>1</sup>, Alessandra Moraes Pedrosa<sup>1</sup>, Bruna Cristina Alves<sup>1</sup>,  
José Carlos  
Fernandes Galduróz<sup>2</sup>, Vinícius Silva Belo<sup>1</sup>, Valéria Ernestânia Chaves<sup>1</sup> and  
Joaquim Maurício Duarte-Almeida<sup>1,\*</sup>

<sup>1</sup>Universidade Federal de São João del-Rei, Campus Centro-Oeste Dona Lindu, Divinópolis, Minas Gerais, Brazil; <sup>2</sup>Department of Psychobiology (Departamento de Psicobiologia), Universidade Federal de São Paulo, São Paulo, São Paulo, Brazil; Full Postal Address: R. Sebastião Gonçalves Coelho, 400 - Chanadour, CEP 35501-296, Divinópolis - MG, Brazil

**Table S1.** Details of the search strategy.

| Base           | Search criteria                                                                                                                                                                                                  |
|----------------|------------------------------------------------------------------------------------------------------------------------------------------------------------------------------------------------------------------|
| PubMed         | ("autistic disorder"[MeSH Terms] OR ("autistic"[All Fields] AND "disorder"[All Fields]) OR "autistic disorder"[All Fields] OR "autism"[All Fields]) AND ("risperidone"[MeSH Terms] OR "risperidone"[All Fields]) |
| Scopus         | (TITLE-ABS-KEY (autism) AND TITLE-ABS-KEY (risperidone))                                                                                                                                                         |
| Web of Science | TOPIC: (Autism) AND TOPIC: (Risperidone)<br>Timespan: All years. Index: SCI-EXPANDED, SSCI, A&HCI, CPCI-S, CPCI-SSH, ESCI.                                                                                       |

**Supplementary Table 3. Quality assessment of included studies using Jadad scale.**

| study                     | Was the study described as random? | Was the randomization scheme described and appropriate? | Was the study described as double-blind? | Was the method of double blinding appropriate? | Was there a description of dropouts and withdrawals? | Total | Quality |
|---------------------------|------------------------------------|---------------------------------------------------------|------------------------------------------|------------------------------------------------|------------------------------------------------------|-------|---------|
| Rezaei et al., 2018       | 1                                  | 1                                                       | 0                                        | 0                                              | 1                                                    | 3     | High    |
| Firouzabadi et al., 2017  | 0                                  | 0                                                       | 0                                        | 0                                              | 1                                                    | 1     | Low     |
| Nikvarz et al., 2017      | 1                                  | 1                                                       | 0                                        | 0                                              | 1                                                    | 3     | High    |
| Aman et al., 2015         | 1                                  | 1                                                       | 0                                        | 0                                              | 1                                                    | 3     | High    |
| Choi et al., 2014         | 1                                  | 1                                                       | 0                                        | 0                                              | 1                                                    | 3     | High    |
| Ghaeli et al., 2014       | 0                                  | 0                                                       | 0                                        | 0                                              | 1                                                    | 1     | Low     |
| Ghanizadeh et al., 2014   | 0                                  | -1                                                      | 0                                        | -1                                             | 1                                                    | -1    | Low     |
| Kent et al., 2013         | 1                                  | 0                                                       | 0                                        | 0                                              | 0                                                    | 1     | Low     |
| Kent et al., 2013         | 0                                  | 0                                                       | 0                                        | 0                                              | 1                                                    | 1     | Low     |
| Arnold et al., 2012       | 0                                  | 0                                                       | 0                                        | 0                                              | 1                                                    | 1     | Low     |
| DeSousa et al., 2010      | 0                                  | 0                                                       | 0                                        | 0                                              | 1                                                    | 1     | Low     |
| Gencer et al., 2008       | 1                                  | 1                                                       | 1                                        | 1                                              | 1                                                    | 5     | High    |
| Miral et al., 2008        | 0                                  | 0                                                       | 0                                        | 0                                              | 1                                                    | 1     | Low     |
| Pandina et al., 2007      | 1                                  | 1                                                       | 1                                        | 1                                              | 1                                                    | 5     | High    |
| McCracken et al., 2005    | 1                                  | 1                                                       | 0                                        | 0                                              | 1                                                    | 3     | High    |
| Troost et al., 2005       | 1                                  | 1                                                       | 0                                        | 0                                              | 0                                                    | 2     | Low     |
| Shea et al., 2004         | 1                                  | -1                                                      | 1                                        | 1                                              | 1                                                    | 3     | High    |
| Arnold et al., 2003       | 0                                  | 0                                                       | 0                                        | 0                                              | 0                                                    | 0     | Low     |
| McCracken et al., 2002    | 0                                  | 0                                                       | 0                                        | 0                                              | 1                                                    | 1     | Low     |
| Lamberti et al., 2018     | 0                                  | 0                                                       | 0                                        | 0                                              | 0                                                    | 0     | Low     |
| Scahill et al., 2016      | 0                                  | 0                                                       | 0                                        | 0                                              | 1                                                    | 1     | Low     |
| Yoon et al., 2016         | 1                                  | 1                                                       | 1                                        | 1                                              | 1                                                    | 5     | High    |
| Calarge et al., 2015      | 1                                  | 1                                                       | 1                                        | 1                                              | 1                                                    | 5     | High    |
| Boon-yasidhi et al., 2014 | 1                                  | 1                                                       | 1                                        | 1                                              | 1                                                    | 5     | High    |
| Wink et al., 2014         | 1                                  | 1                                                       | 1                                        | 1                                              | 1                                                    | 5     | High    |
| Wei et al., 2011          | 0                                  | 0                                                       | 0                                        | 0                                              | 0                                                    | 0     | Low     |
| Correia et al., 2010      | 1                                  | 1                                                       | 1                                        | 1                                              | 1                                                    | 5     | High    |
| Hoekstra et al., 2010     | 1                                  | 1                                                       | 1                                        | 1                                              | 1                                                    | 5     | High    |
| Capone et al., 2008       | 1                                  | 1                                                       | 1                                        | 1                                              | 1                                                    | 5     | High    |
| Anderson et al., 2007     | 1                                  | 1                                                       | 1                                        | 1                                              | 1                                                    | 5     | High    |
| Canitano et al., 2006     | 0                                  | 0                                                       | 0                                        | 0                                              | 0                                                    | 0     | Low     |
| Lindsay et al., 2006      | 0                                  | 0                                                       | 0                                        | 0                                              | 1                                                    | 1     | Low     |
| Luby et al., 2006         | 0                                  | 0                                                       | 0                                        | 0                                              | 1                                                    | 1     | Low     |
| Nagaraj et al., 2006      | 1                                  | -1                                                      | 0                                        | -1                                             | 1                                                    | 0     | Low     |
| Aman et al., 2005         | 1                                  | 1                                                       | 1                                        | 1                                              | 1                                                    | 5     | High    |

|                       |   |   |   |   |   |   |      |
|-----------------------|---|---|---|---|---|---|------|
| Gagliano et al., 2004 | 0 | 0 | 1 | 1 | 1 | 3 | High |
| Martin et al., 2004   | 1 | 1 | 1 | 1 | 1 | 5 | Low  |
| Masi et al., 2001     | 0 | 0 | 0 | 0 | 1 | 1 | Low  |
| Masi et al., 2000     | 0 | 0 | 0 | 0 | 1 | 1 | Low  |
| Zuddas et al., 2000   | 0 | 0 | 0 | 0 | 1 | 1 | Low  |
| Nicolson et al., 1997 | 0 | 0 | 0 | 0 | 1 | 1 | Low  |

<sup>1</sup> score lower than 3 were classified as low quality, while those higher than 3 were classified as high quality [19].

| Study                           | Randomization process | Deviations from intended interventions | Missing outcome data | Measurement of the outcome | Selection of the reported result | Overall Bias |
|---------------------------------|-----------------------|----------------------------------------|----------------------|----------------------------|----------------------------------|--------------|
| Rezaei et al., 2018             | +                     | +                                      | +                    | +                          | +                                | +            |
| Firouzabadi et al., 2017        | ?                     | +                                      | +                    | +                          | +                                | !            |
| Nikvarz et al., 2017            | +                     | +                                      | +                    | ?                          | +                                | !            |
| Aman et al., 2015               | -                     | +                                      | +                    | ?                          | +                                | -            |
| Choi et al., 2014               | +                     | +                                      | +                    | +                          | +                                | -            |
| Ghaeli et al., 2014             | -                     | +                                      | +                    | ?                          | +                                | -            |
| Ghanizadeh et al., 2014         | +                     | +                                      | +                    | +                          | +                                | +            |
| Kent et al., 2013               | +                     | +                                      | +                    | +                          | +                                | +            |
| Kent et al., 2013               | ?                     | +                                      | +                    | ?                          | +                                | !            |
| Arnold et al., 2012             | +                     | +                                      | +                    | ?                          | +                                | !            |
| DeSousa et al., 2010            | ?                     | +                                      | +                    | ?                          | +                                | !            |
| Gencer et al., 2008             | +                     | +                                      | +                    | ?                          | +                                | !            |
| Miral et al., 2008              | +                     | +                                      | +                    | +                          | +                                | +            |
| Pandina et al., 2007            | +                     | +                                      | +                    | +                          | +                                | +            |
| McCracken et al., 2005          | +                     | +                                      | +                    | +                          | +                                | +            |
| Troost et al., 2005             | +                     | +                                      | +                    | +                          | +                                | +            |
| Shea et al., 2004               | +                     | +                                      | +                    | +                          | +                                | +            |
| Arnold et al., 2003             | -                     | +                                      | +                    | +                          | +                                | -            |
| McCracken et al., 2002          | +                     | +                                      | +                    | +                          | +                                | +            |
| Lamberti et al., 2018           | -                     | +                                      | +                    | ?                          | +                                | -            |
| Scahill et al., 2016            | +                     | +                                      | +                    | +                          | +                                | +            |
| Yoon et al., 2016               | -                     | +                                      | +                    | +                          | +                                | -            |
| Calarge et al., 2015            | +                     | +                                      | +                    | ?                          | +                                | !            |
| Boon-yasidhi et al., 2014       | -                     | +                                      | +                    | ?                          | +                                | -            |
| Wink et al., 2014               | -                     | +                                      | +                    | ?                          | +                                | -            |
| Wei et al., 2011                | +                     | +                                      | +                    | +                          | +                                | +            |
| Correia et al., 2010            | -                     | +                                      | +                    | ?                          | +                                | -            |
| Hoekstra et al., 2010           | -                     | +                                      | +                    | ?                          | +                                | -            |
| Capone et al., 2008             | -                     | +                                      | +                    | ?                          | +                                | -            |
| Anderson et al., 2007           | -                     | +                                      | +                    | ?                          | +                                | -            |
| Canitano et al., 2006           | -                     | +                                      | +                    | ?                          | +                                | -            |
| Lindsay et al., 2006            | +                     | +                                      | +                    | +                          | +                                | +            |
| Luby et al., 2006               | +                     | +                                      | +                    | +                          | +                                | +            |
| Nagaraj et al., 2006            | +                     | +                                      | +                    | +                          | +                                | +            |
| Aman et al., 2005               | +                     | +                                      | +                    | +                          | +                                | -            |
| Gagliano et al., 2004           | -                     | +                                      | +                    | ?                          | +                                | -            |
| Martin et al., 2004             | -                     | +                                      | +                    | ?                          | +                                | -            |
| Masi et al., 2001               | -                     | +                                      | +                    | +                          | +                                | -            |
| Masi et al., 2000               | -                     | +                                      | +                    | ?                          | +                                | -            |
| Zuddas et al., 2000             | -                     | +                                      | +                    | ?                          | +                                | -            |
| Nicolson, Awad and Sloman, 1997 | -                     | +                                      | +                    | ?                          | +                                | -            |

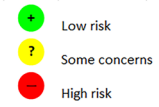

Supplementary Fig. 1. Cochrane Risk of Bias Tool of study quality indicators in 41 included studies.

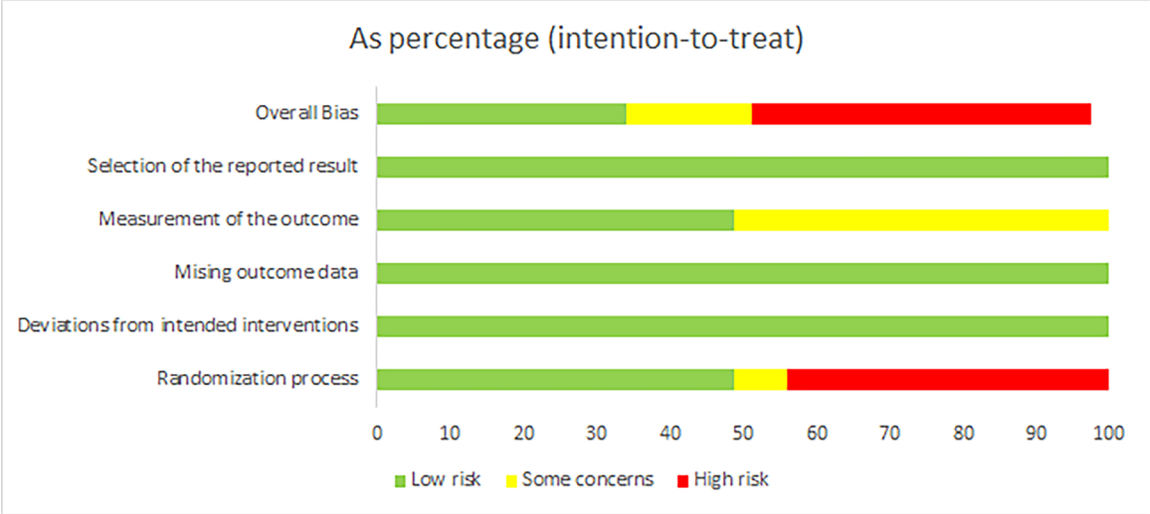

Supplementary Fig. 2. Summary of Cochrane Risk of Bias Tool assessment on risperidone studies.
